# Supplementary material for: Simultaneous evaluation of antibodies that inhibit SARS-CoV-2 variants via multiplex assay
Source: PubMed Central journal article supplement (PMC8409985; doi:10.1172/jci.insight.150012), 2021-08-23
Supplement: jciinsight-6-150012-s063.pdf [file jciinsight-6-150012-s063.pdf]

# Supplementary Figures

Fig S1.

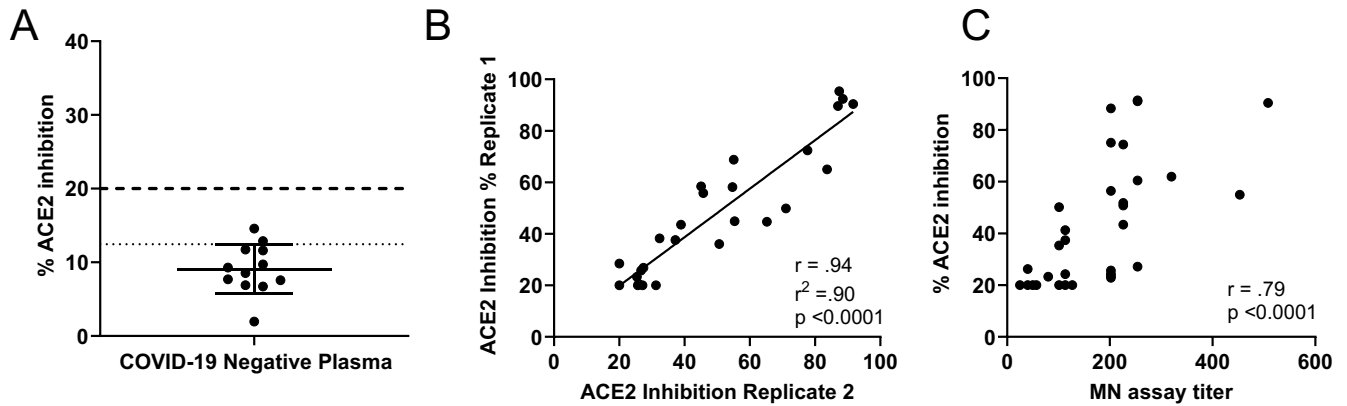

**Supp Figure 1.** **A.** Determination of the ACE2-RBD inhibition cut-off of 20% based of testing  $n=12$  SARS-CoV-2 negative samples at a 1 in 100 plasma dilution, with the light dotted line representing 1 standard deviation from the mean, and the solid dotted line representing the assay cut-off at the Mean + 2 Standard Deviations **B.** Pearson's correlation and linear regression between the mean % inhibition obtained from testing convalescent SARS-CoV-2 samples on two independent days, by two operators **C.** Spearman's correlation of the mean % ACE2 inhibition obtained from two independent multiplex runs vs the microneutralization titer obtained for each sample

**Fig S2.**

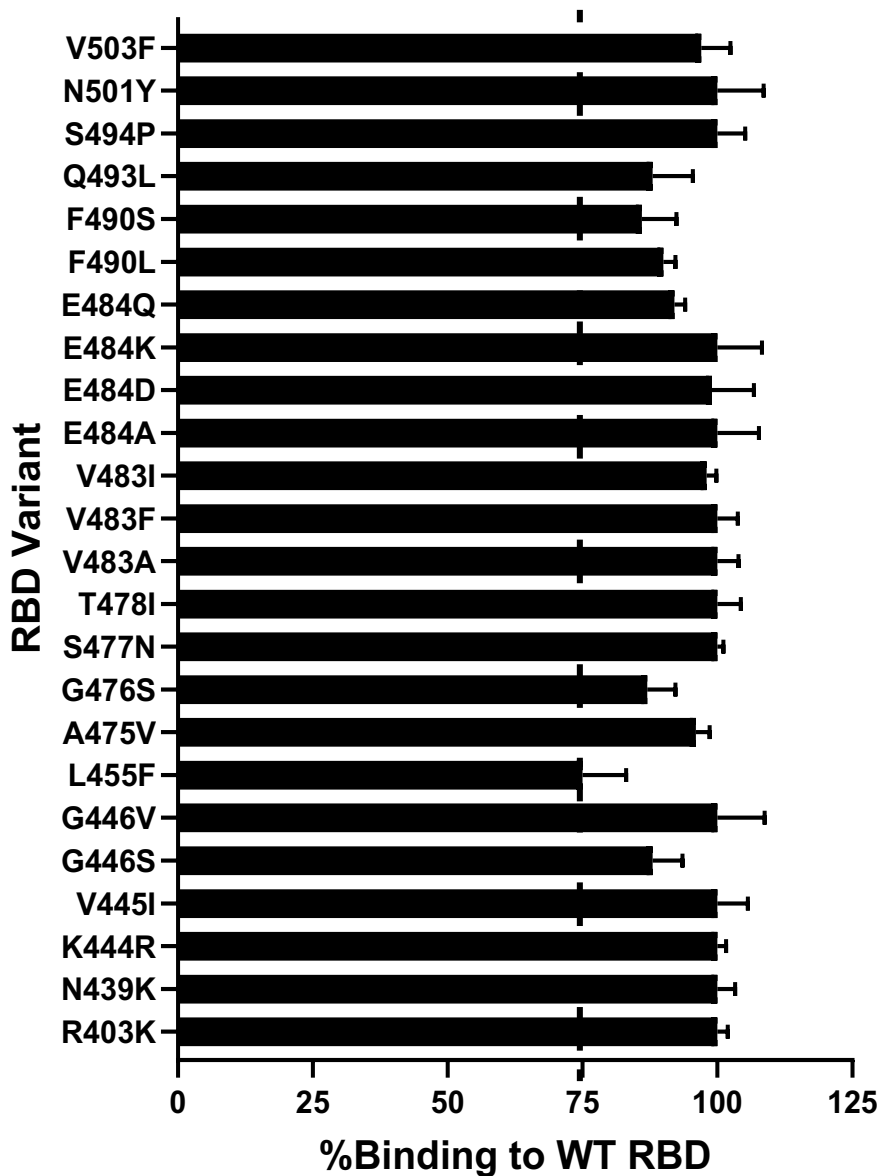

**Supp Figure 2. Coupling Efficiency of RBD variants**

Coupling efficiency of each recombinant RBD variant was measured on the multiplex assay with 10µg/ml of anti-His Tag antibody. Coupling of each variant was compared to the WT RBD. All included variants were coupled to at least 75% relative to WT as indicated by the dotted line. Variants with a calculated >100% coupling efficiency to WT are capped to 100%. Bars represent mean± SD, determined from two independent experiments.

**Fig S3.**

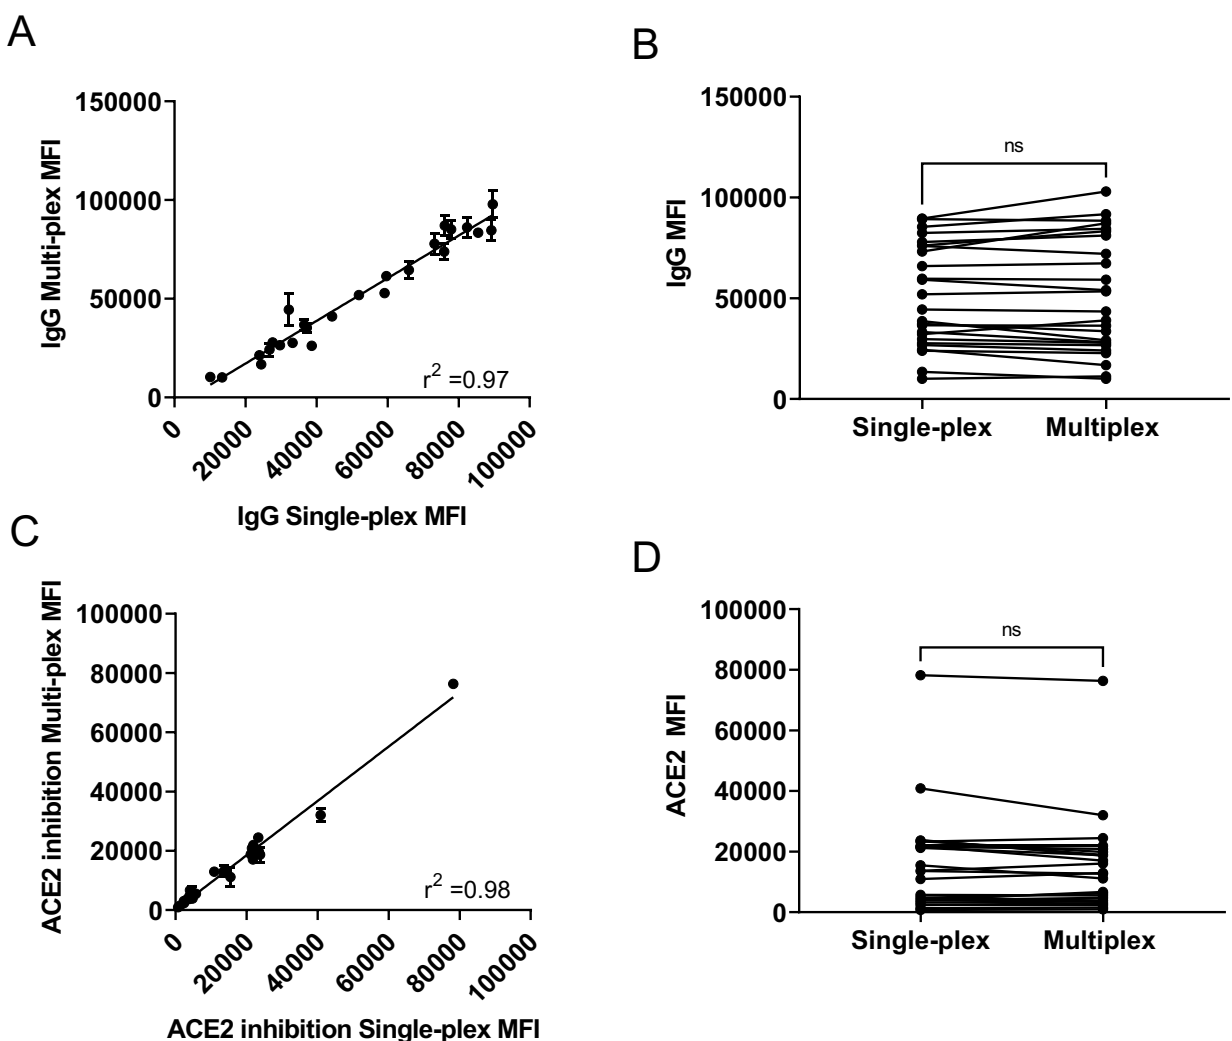

**Supp Figure 3. Single-plex vs Multi-Plex Comparison**

MFI values of wells containing a single bead region coupled to an RBD variant were assayed and compared to MFI values obtained for the full array of RBD variants in a single well (multi-plex). Data represent the mean of duplicates and  $\pm$  SEM. **A.** Linear regression between IgG Single-plex vs Multi-plex MFI **B.** Wilcoxon paired t-test comparison between IgG Single-plex vs Multi-plex MFI. **C.** Linear regression between ACE2 inhibition Single-plex vs Multi-plex MFI. **D.** Wilcoxon paired t-test comparison between ACE2 Single-plex vs Multi-plex MFI

**Fig S4.**

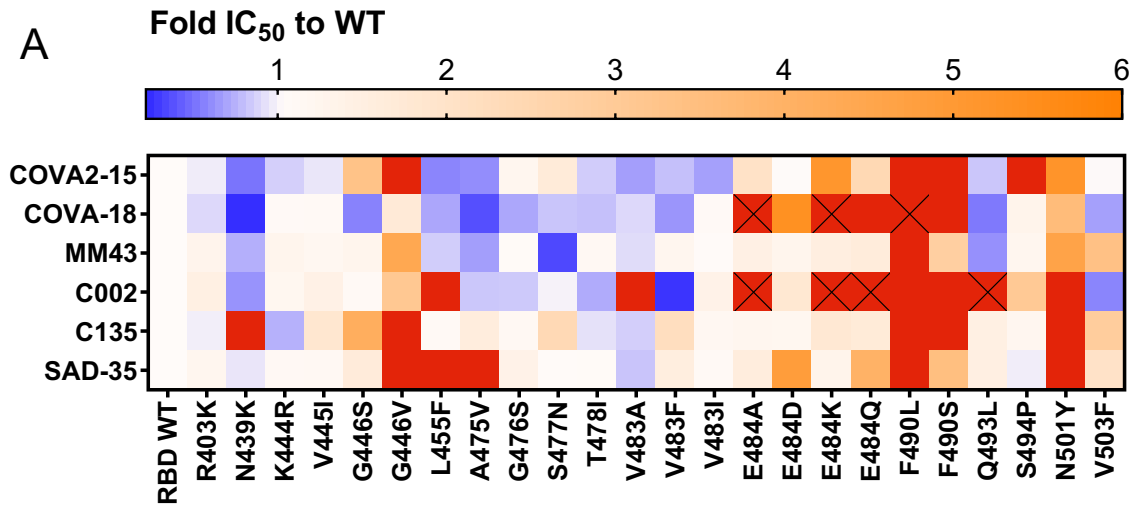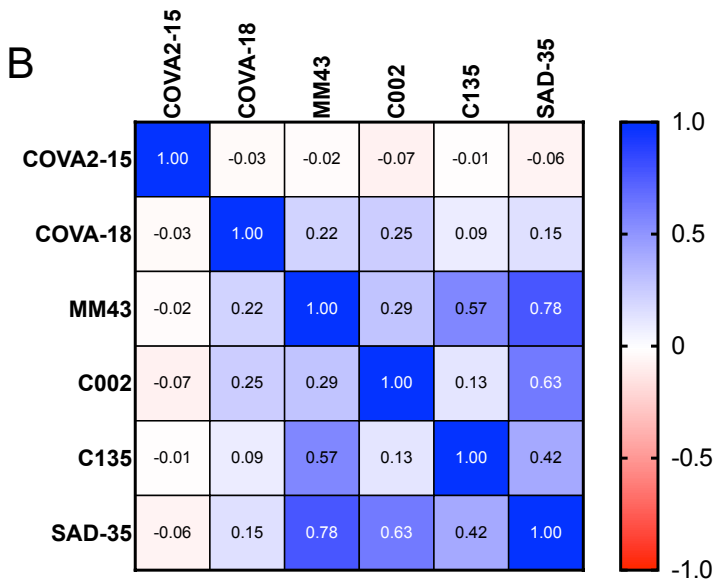

**Supp Figure 4.**

A. Non-Competitive assay values of RBD natural variant ACE2-RBD IC<sub>50</sub> inhibition relative to RBD WT. Blue - Stronger inhibition of RBD variants relative to WT (IC<sub>50</sub> < RBD WT) Orange- Weaker inhibition of RBD variants relative to WT (>1-6 fold RBD WT IC<sub>50</sub>). Red >6 fold weaker RBD WT IC<sub>50</sub> (Very poor/absence of inhibition)

B. Correlation matrix of RBD natural variant ACE2-RBD IC<sub>50</sub> inhibition using the competitive assay format. Values reported are Pearson's r

**Fig S5.**

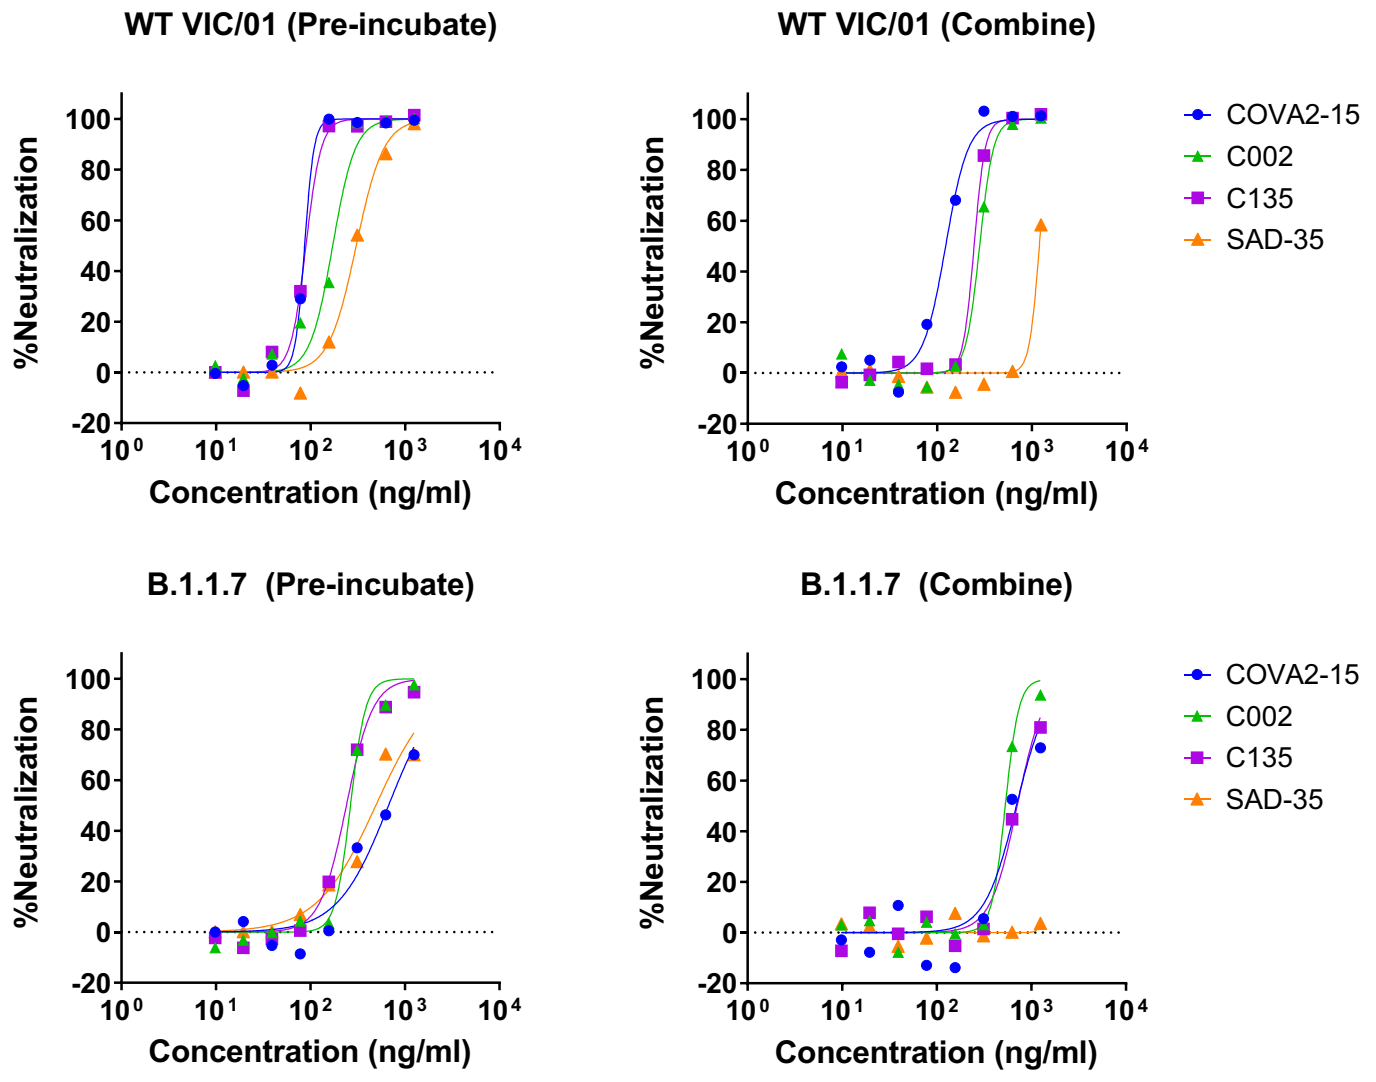

**Supp Figure 5.**

Graphs showing % Neutralization of WT VIC/01 and B.1.1.7 virus either pre-incubated with mAb for 1 hour vs mAb and virus added to ACE2 expressing cells together (combined)



## Table S1.

### Characteristics of subjects recovered from COVID-19

| Characteristic                                |                                |
|-----------------------------------------------|--------------------------------|
| Age, median-years                             | 59                             |
| Male sex-no.%                                 | 18 (85%)                       |
| Time since +nasal swab SARS-CoV2 PCR, Median* | 36                             |
| Date of SARS-CoV2 PCR test                    | March-April 2020               |
| Location of test                              | Melbourne, Victoria, Australia |
| Illness severity**                            | 8 (40%)                        |
| Mild-no.(%)                                   |                                |
| Moderate-no.(%)                               | 6 (30%)                        |
| Severe-no.(%)                                 | 3 (15 %)                       |

One subject has a false negative PCR result

\*\*Illness severity was classified as:

Mild: prominent upper respiratory tract symptoms and not hospitalised.

Moderate: prominent lower respiratory tract symptoms and not hospitalised.

Severe: prominent lower respiratory tract symptoms and requiring hospital care.

-no data availability on illness severity of 3 subjects

## Table S2.

### Multiplex Assay Validation Parameters

---

|                     |                                                               |
|---------------------|---------------------------------------------------------------|
| Sensitivity         | 97.1% (34 of 35 MN positive)                                  |
| Specificity         | 90.9% (10 of 11 MN Negative)                                  |
| Accuracy            | 95.7% (44/46 MN total)                                        |
| Precision           | intra-% CV=1.2 ( <i>n</i> =6) , inter-% CV=2.1 ( <i>n</i> =6) |
| Robustness          | $r^2$ 0.9                                                     |
| Range               | 20-100% inhibition                                            |
| Acceptance Criteria | Mean Duplicate CV <30%                                        |

---



# Table S3

## RBD Variant – ACE2 Inhibition Multiplex Assay Bead Cocktail

| Bead Supplier | Catalogue # | Bead region # | Protein | Protein description      | Protein supplier             | Protein expression system | Protein coupled / 1x10 <sup>7</sup> beads |
|---------------|-------------|---------------|---------|--------------------------|------------------------------|---------------------------|-------------------------------------------|
| Biorad        | C10013-01   | 13            | RBD-WT  | SARS-CoV-2 RBD Wild-type | Genscript Plasmid            | HEK293 cells              | 100ug                                     |
| Biorad        | C10072-01   | 72            | R403K   | SARS-CoV-2 RBD mutant    | Genscript Plasmid            | HEK293 cells              | 100ug                                     |
| Biorad        | C10043-01   | 43            | N439K   | SARS-CoV-2 RBD mutant    | Genscript Plasmid            | HEK293 cells              | 100ug                                     |
| Biorad        | C10047-01   | 47            | K444R   | SARS-CoV-2 RBD mutant    | Genscript Plasmid            | HEK293 cells              | 100ug                                     |
| Biorad        | C10054-01   | 54            | V445I   | SARS-CoV-2 RBD mutant    | Genscript Plasmid            | HEK293 cells              | 100ug                                     |
| Biorad        | C10063-01   | 63            | G446S   | SARS-CoV-2 RBD mutant    | Genscript Plasmid            | HEK293 cells              | 100ug                                     |
| Biorad        | C10073-01   | 73            | G446V   | SARS-CoV-2 RBD mutant    | Genscript Plasmid            | HEK293 cells              | 100ug                                     |
| Biorad        | C10014-01   | 14            | L455F   | SARS-CoV-2 RBD mutant    | Genscript Plasmid            | HEK293 cells              | 100ug                                     |
| Biorad        | C10020-01   | 20            | A475V   | SARS-CoV-2 RBD mutant    | Genscript Plasmid            | HEK293 cells              | 100ug                                     |
| Biorad        | C10026-01   | 26            | G476S   | SARS-CoV-2 RBD mutant    | Genscript Plasmid            | HEK293 cells              | 100ug                                     |
| Biorad        | C10046-01   | 46            | S477N   | SARS-CoV-2 RBD mutant    | Genscript Plasmid            | HEK293 cells              | 100ug                                     |
| Biorad        | C10044-01   | 44            | T478I   | SARS-CoV-2 RBD mutant    | Genscript Plasmid            | HEK293 cells              | 100ug                                     |
| Biorad        | C10066-01   | 66            | V483A   | SARS-CoV-2 RBD mutant    | Genscript Plasmid            | HEK293 cells              | 100ug                                     |
| Biorad        | C10051-01   | 51            | V483F   | SARS-CoV-2 RBD mutant    | Genscript Plasmid            | HEK293 cells              | 100ug                                     |
| Biorad        | C10056-01   | 56            | V483I   | SARS-CoV-2 RBD mutant    | Genscript Plasmid            | HEK293 cells              | 100ug                                     |
| Biorad        | C10067-01   | 67            | E484A   | SARS-CoV-2 RBD mutant    | Genscript Plasmid            | HEK293 cells              | 100ug                                     |
| Biorad        | C10019-01   | 19            | E484D   | SARS-CoV-2 RBD mutant    | Genscript Plasmid            | HEK293 cells              | 100ug                                     |
| Biorad        | C10022-01   | 22            | E484K   | SARS-CoV-2 RBD mutant    | Genscript Plasmid            | HEK293 cells              | 100ug                                     |
| Biorad        | C10015-01   | 15            | E484Q   | SARS-CoV-2 RBD mutant    | Genscript Plasmid            | HEK293 cells              | 100ug                                     |
| Biorad        | C10039-01   | 39            | F490L   | SARS-CoV-2 RBD mutant    | Genscript Plasmid            | HEK293 cells              | 100ug                                     |
| Biorad        | C10042-01   | 42            | F490S   | SARS-CoV-2 RBD mutant    | Genscript Plasmid            | HEK293 cells              | 100ug                                     |
| Biorad        | C10045-01   | 45            | Q493L   | SARS-CoV-2 RBD mutant    | Genscript Plasmid            | HEK293 cells              | 100ug                                     |
| Biorad        | C10053-01   | 53            | S494P   | SARS-CoV-2 RBD mutant    | Genscript Plasmid            | HEK293 cells              | 100ug                                     |
| Biorad        | C10062-01   | 62            | N501Y   | SARS-CoV-2 RBD mutant    | Genscript Plasmid            | HEK293 cells              | 100ug                                     |
| Biorad        | C10065-01   | 65            | V503F   | SARS-CoV-2 RBD mutant    | Genscript Plasmid            | HEK293 cells              | 100ug                                     |
| Biorad        | C10084-01   | 84            | Spike-1 | SARS-CoV-2 Spike-1       | Sinobiological (#40591-V08H) | HEK293 cells              | 100ug                                     |

# Table S4

## Reagents used in the RBD Multiplex Bead Assay

| Reagent                              | Multiplex Assay                            | Conjugate     | Reagent Conc (Vol added)/well | Source                                               | Catalogue #          |
|--------------------------------------|--------------------------------------------|---------------|-------------------------------|------------------------------------------------------|----------------------|
| RBD-Variant Multiplex Bead Cocktail  | Both RBD-IgG binding & RBD-ACE2 inhibition | See Table S2  | 700 beads (20 $\mu$ l)        | See Table S2                                         | See Table S2         |
| AviTagged Human ACE2                 | RBD-ACE2 inhibition                        | Biotin        | 25 $\mu$ g/ml (20 $\mu$ l)    | pHLSec expression plasmid; expressed in HEK293 cells | In house-see methods |
| Streptavidin, R-Phycoerythrin        | RBD-ACE2 inhibition                        | Phycoerythrin | 4 $\mu$ g/ml (40 $\mu$ l)     | Thermo Fisher Scientific                             | S866                 |
| R-Phycoerythrin, Biotin-XX Conjugate | RBD-ACE2 inhibition                        | Phycoerythrin | 10 $\mu$ g/ml (10 $\mu$ l)    | Thermo Fisher Scientific                             | P811                 |
| Anti-human IgG Fc                    | RBD-IgG binding                            | Phycoerythrin | 1.3 $\mu$ g/ml (25 $\mu$ l)   | Southern Biotech                                     | 9040-09              |
